# Supplementary material for: Prevalence and factors associated with low back pain among health care workers in southwestern Saudi Arabia
Source: PubMed Central journal article supplement (PMC6368758; doi:10.1186/s12891-019-2431-5), 2019-02-08
Supplement: 12891_2019_2431_MOESM1_ESM.pdf [file 12891_2019_2431_MOESM1_ESM.pdf]

## Questionnaire Back Pain

Dear healthcare worker, The following questionnaire aims To estimate the prevalence of back pain among health care workers, southern region, Saudi Arabia. We would be very grateful if you could help us by completing this questionnaire. Filling this questionnaire means agreement to participate in the study.

1. Name of the Hospital/PHCC.....
2. Gender        Male/Female
3. Age .....
4. Nationality     Saudi /non Saudi
5. Length .....cm        Weight .....Kg.    Dominant hand (Right / Left)
6. Profession: Physician: general practitioner / registrar / resident / consultant  
Nurse: practical / specialist  
  
Lab Technician / specialist  
  
Radiologist        Pharmacologist        Psychologist  
  
social worker     Dentist                Other.....
7. Department:    Medical / specialty.....  
                          Surgical / specialty .....
- ER        OPD        ICU        IMCU        Home visit
- Pharmacy
- Dental center        Lab        Other: .....
8. Years of Work    .....
9. Work status:    Long standing /Sitting /Both)
10. Smoking Yes / No
11. Do you have back pain? yes/ no        if Yes How long? .....
- did you Need a Drug to relieve a pain? Yes/No,        if yes what type of drug did use?.....
12. If you have back pain which part of your back: cervical(neck) thoracic(middle to upper back) Lumbar(lower back)
13. If have back pain do you Need to take a break time: Yes (How long) / No
14. Did you do exercises to relieve pain? Yes/ no    if yes which type of exercises do you do?.....
15. Did you visit a Neurosurgical Clinic due to Back pain Yes / No
16. Do have any Chronic Disease:(DM. HTN. ASTHMA. RENAL.) Other.....
17. History of back trauma: Yes (since .....) / No
18. Other neurological symptoms on your limb    Pain /Numbness/ Weakness
19. Are you an Athlete Yes / NO
